# Supplementary material
Source: PubMed Central journal article supplement (PMC8379313)
Supplement: 12250_2021_358_MOESM1_ESM.pdf [file 12250_2021_358_MOESM1_ESM.pdf]

## Electronic Supplementary Material

### Effects of N-linked Glycan on Lassa Virus Envelope Glycoprotein Cleavage, Infectivity, and Immune Response

Xueqin Zhu<sup>1,2</sup> • Yang Liu<sup>1</sup> • Jiao Guo<sup>1,2</sup> • Junyuan Cao<sup>1,2</sup> • Zonglin Wang<sup>1,2</sup> • Gengfu Xiao<sup>1,2</sup> • Wei Wang<sup>1,2</sup>✉

1. State Key Laboratory of Virology, Wuhan Institute of Virology, Center for Biosafety Mega-Science, Chinese Academy of Sciences, Wuhan 430071, China

2. University of the Chinese Academy of Sciences, Beijing 100049, China

Supporting information to DOI: 10.1007/s12250-021-00358-y

**Table S1** Primers for the mutagenesis.

|                  | N→Q                                    | N→A                                    | S/T→A                                     |
|------------------|----------------------------------------|----------------------------------------|-------------------------------------------|
| N <sub>79</sub>  | AACATGGAGACTC <u>CAA</u> ATGACCATGC    | AACATGGAGACTC <u>GCC</u> ATGACCATGC    | GGAGACTCAATAT <u>GCC</u> ATGCCTCTCTC      |
| MT               | <u>TTG</u> GAGTGTCTCCATGTTTAGTTCCAG    | <u>GGC</u> GAGTGTCTCCATGTTTAGTTCCAG    | <u>GGC</u> CATATTGAGTGTCTCCATGTTTAGTTCC   |
| N <sub>89</sub>  | CTCTCCTGCACAAAG <u>CAA</u> AACAGTCATC  | CTCTCCTGCACAAAG <u>GCC</u> AACAGTCATC  | TGCACAAAGAACAAC <u>GCT</u> CATCATT        |
| NS               | <u>TTG</u> CTTTGTGCAGGAGAGAGGCATGGT    | <u>GGC</u> CTTTGTGCAGGAGAGAGGCATGGT    | <u>AGC</u> GTTGTTCTTTGTGCAGGAGAGA         |
| N <sub>99E</sub> | ATATAATGGTGGG <u>CCA</u> AGAGACAGGA    | ATATAATGGTGGG <u>GCC</u> GAGACAGGA     | TAATGGTGGCAATGAG <u>GCA</u> GAGACTAGAAC   |
| T                | <u>TTG</u> GCCCACCATTATATAATGATGACT    | <u>GGC</u> GCCCACCATTATATAATGATGACT    | <u>TGC</u> CTCATTGCCACCATTATATAATGATGAC   |
| N <sub>109</sub> | GAACTGACCTGAC <u>CCA</u> ACGAGCATTAA   | GAACTGACCTGAC <u>GCC</u> ACGAGCATTAA   | GACCTGACCAACAC <u>GCC</u> CATTATTAATCAC   |
| TS               | <u>TTG</u> GGTCAAGGTCAGTTCTAGTCCTGT    | <u>GGC</u> GGTCAAGGTCAGTTCTAGTCCTGT    | <u>GGC</u> CGTGTGGTCAAGGTCAGTTCTAGTCC     |
| N <sub>119</sub> | ATCACAAATTTG <u>CAA</u> ACTGTCTGATG    | ATCACAAATTTG <u>CGC</u> CTGTCTGATG     | CAAATTTGCAATCT <u>GCT</u> GATGCCACAA      |
| LS               | <u>TTG</u> GCAAAATTTGTGATTAATAATGCT    | <u>GGC</u> GCAAAATTTGTGATTAATAATGCT    | <u>AGC</u> CAGATTGCAAAATTTGTGATTAATAATG   |
| N <sub>167</sub> | TTAGTGTGCAGTAC <u>CAA</u> CTGAGTCACA   | TTAGTGTGCAGTAC <u>GCC</u> CTGAGTCACA   | TGTGCAGTACAACCT <u>GCT</u> CACAGCTATGC    |
| LS               | <u>TTG</u> GTA CTGCACACTAATCTTTCCCCCA  | <u>GGC</u> GTA CTGCACACTAATCTTTCCCCCA  | <u>AGC</u> CAGGTTGTA CTGCACACTAATCTTTCCCC |
| N <sub>224</sub> | TATCTGATAATCCA <u>CAA</u> ACAACCTGGG   | TATCTGATAATCCA <u>GCC</u> ACAACCTGGG   | GATAATCCAAAATAC <u>GCT</u> TGGGAAGATC     |
| TT               | <u>TTG</u> TTGGATTATCAGATATTGATAACT    | <u>GGC</u> TTGGATTATCAGATATTGATAACT    | <u>GGC</u> TGATTTTGGATTATCAGATATTGATA     |
| N <sub>365</sub> | GGAATTCATACTGT <u>CA</u> TACAGCAAGT    | GGAATTCATACTGT <u>GCC</u> TACAGCAAGT   | CCATACTGTAATTAC <u>GCC</u> AAGTATT        |
| YS               | <u>TTG</u> ACAGTATGGAATCCCATGATGTCC    | <u>GGC</u> ACAGTATGGAATCCCATGATGTCC    | <u>GGC</u> GTAATTACAGTATGGAATTTCC         |
| N <sub>373</sub> | AAGTATTGGTACCT <u>CAA</u> CACACA ACTA  | AAGTATTGGTACCT <u>GCC</u> CACACA ACTA  | TTGGTACCTCAACCAC <u>GCA</u> ACTACTGGGAG   |
| HT               | <u>TTG</u> GAGGTACCAATACTTGCTGTA       | <u>GGC</u> GAGGTACCAATACTTGCTGTA       | <u>TGC</u> GTGGTTGAGGTACCAATACTTGCTGTA    |
| N <sub>390</sub> | AATGTTGGCTTGATC <u>CAA</u> AGGTTCTACT  | AATGTTGGCTTGATC <u>GCC</u> AGGTTCTACT  | GCTTGATCAAATGGT <u>GCA</u> TACTTGAACG     |
| GS               | <u>TTG</u> TGATACAAGCCAACATTTGGGCAGTGA | <u>GGC</u> TGATACAAGCCAACATTTGGGCAGTGA | <u>TGC</u> ACCATTTGATACAAGCCAACATTTGG     |
| N <sub>395</sub> | AATGGTTCATACTTG <u>CA</u> AGAGACCCACT  | AATGGTTCATACTTG <u>GCC</u> AGAGACCCACT | TTCATACTGAACGAG <u>GCC</u> CACTTTTCTG     |
| ET               | <u>TTG</u> CAAGTATGAACCATTTGATACAAGC   | <u>GGC</u> CAAGTATGAACCATTTGATACAAGC   | <u>GGC</u> CTCGTTCAAGTATGAACCATTTGATAC    |

**Table S2** Stimulation peptides (predicted by [www.iedb.org](http://www.iedb.org))

|    | Location | Sequencing      | Purity (%) |
|----|----------|-----------------|------------|
| P1 | 277–285  | GYCLTRWML       | 95         |
| P2 | 128–136  | LYDHALMSI       | 95         |
| P3 | 65–73    | VYELQTLEL       | 95         |
| P4 | 315–323  | LFDFNKQAI       | 95         |
| P5 | 156–164  | DFNGGKISV       | 95         |
| P6 | 322–336  | AIQRLKAEAQMSIQL | 95         |
